# Supplementary material for: Genomic determinants of Furin cleavage in diverse European SARS-related bat coronaviruses
Source: Springer Nature journal article supplement (doi:10.1038/s42003-022-03421-w), 2022-05-30
Supplement: 42003_2022_3421_MOESM3_ESM.pdf [file 42003_2022_3421_MOESM3_ESM.pdf]

### **Description of Additional Supplementary Files**

**File name:** Supplementary Data 1

**Description:** Predicted furin cleavage sites with ProP scores for analysis in Figure 3.

**File name:** Supplementary Data 2

**Description:** RT-PCR primer sets for SrC spike glycoprotein gene characterization

**File name:** Supplementary Data 3

**Description:** Accession numbers of viruses included for analysis in Figure 3.
